# Supplementary material for: Remarkable Resilience of Forest Structure and Biodiversity Following Fire in the Peri-Urban Bushland of Sydney, Australia
Source: MDPI journal article supplement (doi:10.3390/cli10060086), 2022-06-16
Supplement: s1 [file s1]

# Supplementary Materials:

**Table S1** All species recorded during 2020/2021 flora plot surveys \* = Weed species

|                                  |
|----------------------------------|
| <b>FILICOPSIDA</b>               |
| DENNSTAEDTIACEAE                 |
| <i>Pteridium esculentum</i>      |
|                                  |
| LINDSAEACEAE                     |
| <i>Lindsaea linearis</i>         |
|                                  |
| PTERIDACEAE                      |
| <i>Cheilanthes sieberi</i>       |
| <i>Pellaea falcata</i>           |
|                                  |
| SCHIZACEAE                       |
| <i>Schizaea bifida</i>           |
|                                  |
| <b>MAGNOLIOPSIDA</b>             |
| <b>DICOTYLEDONS</b>              |
|                                  |
| ACANTHACEAE                      |
| <i>Brunoniella australis</i>     |
| <i>Brunoniella pumilio</i>       |
| <i>Brunoniella</i> sp.           |
|                                  |
| AMARANTHACEAE                    |
| <i>Alternanthera</i> sp.         |
|                                  |
| APIACEAE                         |
| <i>Centella asiatica</i>         |
| * <i>Foeniculum vulgare</i>      |
| <i>Platysace ericoides</i>       |
|                                  |
| APOCYNACEAE                      |
| * <i>Araujia sericifera</i>      |
| <i>Marsdenia viridiflora</i>     |
| <i>Parsonsia straminea</i>       |
|                                  |
| ARALIACEAE                       |
| * <i>Hydrocotyle bonariensis</i> |
| <i>Hydrocotyle tripartita</i>    |

|                                    |
|------------------------------------|
| <i>Trachymene incisa</i>           |
|                                    |
| ASTERACEAE                         |
| * <i>Bidens pilosa</i>             |
| <i>Brachyscome graminea</i>        |
| <i>Brachyscome multifida</i>       |
| <i>Brachyscome</i> sp.             |
| <i>Calotis cuneifolia</i>          |
| <i>Cassinia</i> sp.                |
| <i>Centipeda minima</i>            |
| <i>Chrysocephalum apiculatum</i> . |
| * <i>Cirsium vulgare</i>           |
| * <i>Conyza bonariensis</i>        |
| * <i>Conyza sumatrensis</i>        |
| * <i>Conyza</i> sp.                |
| <i>Coronidium scorpioides</i>      |
| <i>Cyanthillium cinereum</i>       |
| <i>Eclipta platyglossa</i>         |
| <i>Euchiton involucratus</i>       |
| <i>Euchiton sphaericus</i>         |
| <i>Euchiton</i> sp.                |
| * <i>Facelis retusa</i>            |
| <i>Gamochaeta</i> sp.              |
| <i>Helichrysum scorpioides</i>     |
| * <i>Hypochaeris radicata</i>      |
| <i>Lactuca serriola</i>            |
| <i>Lagenophora stipitata</i>       |
| <i>Olearia microphylla</i> .       |
| <i>Ozothamnus diosmifolius</i>     |
| <i>Pseudognaphalium luteoalbum</i> |
| * <i>Senecio madagascariensis</i>  |
| <i>Solenogyne bellioides</i>       |
| * <i>Sonchus oleraceus</i>         |
| <i>Sphaeromorphaea australis</i>   |
| * <i>Taraxacum officiale</i>       |
| <i>Vittadinia cuneata</i>          |
|                                    |
| CAMPANULACEAE                      |
| <i>Wahlenbergia gracilis</i>       |
| <i>Wahlenbergia stricta</i>        |
| <i>Wahlenbergia</i> sp.            |

|                                 |
|---------------------------------|
|                                 |
| CASUARINACEAE                   |
| <i>Allocasuarina glareicola</i> |
| <i>Allocasuarina littoralis</i> |
|                                 |
| CELASTRACEAE                    |
| <i>Stackhousia viminea</i>      |
|                                 |
| CHENOPODIACEAE                  |
| <i>Einadia nutans</i>           |
| <i>Einadia trigonos</i>         |
|                                 |
| CONVOLVULACEAE                  |
| <i>Convolvulus erubescens</i>   |
| <i>Dichondra repens</i>         |
|                                 |
| DILLENIACEAE                    |
| <i>Hibbertia aspera</i>         |
| <i>Hibbertia diffusa</i>        |
| <i>Hibbertia fasciculata</i>    |
| <i>Hibbertia puberula</i>       |
| <i>Hibbertia riparia</i>        |
| <i>Hibbertia</i> sp.            |
|                                 |
| DROSERACEAE                     |
| <i>Drosera burmanni</i>         |
| <i>Drosera peltata</i>          |
| <i>Drosera pygmaea</i>          |
| <i>Drosera spatulata</i>        |
|                                 |
| ERICACEAE/                      |
| EPACRIDOIDEA                    |
| <i>Astroloma humifusum</i>      |
| <i>Brachyloma daphnoides</i>    |
| <i>Leucopogon setiger</i>       |
| <i>Leucopogon</i> sp.           |
| <i>Leucopogon virgatus</i>      |
| <i>Lissanthe strigosa</i>       |
| <i>Melichrus procumbens</i>     |
| <i>Monotoca elliptica</i>       |
| <i>Monotoca scoparia</i>        |

|                                |
|--------------------------------|
| <i>Styphelia laeta</i>         |
|                                |
| EUPHORBIACEAE                  |
| <i>Amperea xiphioclada</i>     |
| <i>Poranthera microphylla</i>  |
| <i>Ricinocarpos pinifolius</i> |
| * <i>Triadica sebifera</i>     |
|                                |
| FABACEAE                       |
| FABOIDEAE                      |
| <i>Bossiaea heterophylla</i>   |
| <i>Bossiaea obcordata</i>      |
| <i>Bossiaea rhombifolia</i>    |
| <i>Callistachys scandens</i>   |
| <i>Chorizema parviflorum</i>   |
| <i>Daviesia acicularis</i>     |
| <i>Daviesia alata</i>          |
| <i>Daviesia squarrosa</i>      |
| <i>Daviesia ulicifolia</i>     |
| <i>Dillwynia floribunda</i>    |
| <i>Dillwynia glaberrima</i>    |
| <i>Dillwynia rudis</i>         |
| <i>Dillwynia siberi</i>        |
| <i>Dillwynia tenuifolia</i>    |
| <i>Glycine clandestina</i>     |
| <i>Glycine microphylla</i>     |
| <i>Glycine tabacina</i>        |
| <i>Glycine</i> sp.             |
| <i>Gompholobium glabratum</i>  |
| <i>Gompholobium minus</i>      |
| <i>Gompholobium pinnatum</i>   |
| <i>Hardenbergia violacea</i>   |
| <i>Hovea linearis</i>          |
| <i>Jacksonia scoparia</i>      |
| <i>Mirbelia rubiifolia</i>     |
| <i>Pultenaea parviflora</i>    |
| <i>Pultenaea tuberculata</i>   |
| <i>Pultenaea villosa</i>       |
|                                |
| FABACEAE                       |
| MIMOSOIDEAE                    |

|                                     |
|-------------------------------------|
| <i>Acacia brownii</i>               |
| <i>Acacia buxifloia</i>             |
| <i>Acacia bynoeana</i>              |
| <i>Acacia decurrens</i>             |
| <i>Acacia elongata</i>              |
| <i>Acacia falcata</i>               |
| <i>Acacia floribunda</i>            |
| <i>Acacia implexa</i>               |
| <i>Acacia longifolia</i>            |
| <i>Acacia lunata</i>                |
| <i>Acacia parramattensis</i>        |
| <i>Acacia parvipinnula</i>          |
| <i>Acacia podalyriifolia</i>        |
| <i>Acacia ulicifolia</i>            |
|                                     |
| GENTIANACEAE                        |
| * <i>Centaurium erythraea</i>       |
| <i>Centaurium tenuiflorum</i>       |
|                                     |
| GOODENIACEAE                        |
| <i>Dampiera stricta</i>             |
| <i>Goodenia bellidifolia</i>        |
| <i>Goodenia hedeacea</i>            |
| <i>Goodenia paniculata</i>          |
|                                     |
| HALORAGACEAE                        |
| <i>Gonocarpus micranthus</i>        |
| <i>Gonocarpus tetragynus</i>        |
| <i>Gonocarpus teucrioides</i>       |
|                                     |
| HYPERICACEAE                        |
| <i>Hypericum gramineum</i>          |
|                                     |
| LAMIACEAE                           |
| <i>Ajuga australis</i>              |
| <i>Prostanthera scutellarioides</i> |
|                                     |
| LAURACEAE                           |
| <i>Cassytha glabella</i>            |
| <i>Cassytha pubescens</i>           |
| * <i>Cinnamomum camphora</i>        |

|                                  |
|----------------------------------|
|                                  |
| LOBELIACEAE                      |
| <i>Lobelia purpurascens</i>      |
|                                  |
| LOGANIACEAE                      |
| <i>Logania albiflora</i>         |
| <i>Mitrasacme alsinoides</i>     |
| <i>Mitrasacme paludosa</i>       |
| <i>Mitrasacme pilosa</i>         |
| <i>Mitrasacme polymorpha</i>     |
| <i>Orianthera pusilla</i>        |
|                                  |
| LORANTHACEAE                     |
| <i>Amyema gaudichaudii</i>       |
| <i>Amyema pendula</i>            |
| <i>Dendrophthoe vitellina</i>    |
|                                  |
| MELIACEAE                        |
| <i>Melia azedarach</i>           |
|                                  |
| MYRTACEAE                        |
| <i>Angophora bakeri</i>          |
| <i>Angophora floribunda</i>      |
| <i>Angophora subvelutina</i>     |
| <i>Baeckea diosmifolia</i>       |
| <i>Callistemon linearis</i>      |
| <i>Callistemon pinifolius</i>    |
| <i>Corymbia gummifera</i>        |
| <i>Eucalyptus amplifolia</i>     |
| <i>Eucalyptus beyeriana</i>      |
| <i>Eucalyptus crebra</i>         |
| <i>Eucalyptus eugenioides</i>    |
| <i>Eucalyptus fibrosa</i>        |
| <i>Eucalyptus globoidea</i>      |
| <i>Eucalyptus longifolia</i>     |
| <i>Eucalyptus moluccana</i>      |
| <i>Eucalyptus oblonga</i>        |
| <i>Eucalyptus parramattensis</i> |
| <i>Eucalyptus sclerophylla</i>   |
| <i>Eucalyptus sideroxylon</i>    |
| <i>Eucalyptus sparsifolia</i>    |

|                                               |
|-----------------------------------------------|
| <i>Eucalyptus tereticornis</i>                |
| <i>Kunzea ambigua</i>                         |
| <i>Kunzea capitata</i>                        |
| <i>Leptospermum parvifolium</i>               |
| <i>Leptospermum polygalifolium</i>            |
| <i>Leptospermum trinervium</i>                |
| <i>Melaleuca decora</i>                       |
| <i>Melaleuca diosmatifolia</i>                |
| <i>Melaleuca nodosa</i>                       |
| <i>Melaleuca thymifolia</i>                   |
| <i>Micromyrtus ciliata</i>                    |
| <i>Micromyrtus minutiflora</i>                |
| <i>Syncarpia glomulifera</i>                  |
|                                               |
| OCHNACEAE                                     |
| * <i>Ochna serrulata</i>                      |
|                                               |
| OLEACEAE                                      |
| * <i>Ligustrum sinense</i>                    |
| <i>Notelaea longifolia</i>                    |
| * <i>Olea europea</i> subsp. <i>cuspidata</i> |
|                                               |
| OXALIDACEAE                                   |
| * <i>Oxalis corniculata</i>                   |
| <i>Oxalis perennans</i>                       |
|                                               |
| PHYLLANTHACEAE                                |
| <i>Breynia oblongifolia</i>                   |
| <i>Phyllanthus gunnii</i>                     |
| <i>Phyllanthus hirtellus</i>                  |
|                                               |
| PHYTOLACCACEAE                                |
| * <i>Phytolacca octandra</i>                  |
|                                               |
| PITTOSPORACEAE                                |
| <i>Bursaria spinosa</i>                       |
| <i>Billardiera scandens</i>                   |
|                                               |
| PLANTAGINACEAE                                |
| <i>Gratiola pedunculata</i>                   |
| <i>Plantago gaudichaudii</i>                  |

|                                                      |
|------------------------------------------------------|
| * <i>Plantago lanceolata</i>                         |
| <i>Veronica calycina</i>                             |
| <i>Veronica plebeia</i>                              |
|                                                      |
| POLYGALACEAE                                         |
| <i>Comesperma ericinum</i>                           |
| <i>Comesperma sphaerocarpum</i>                      |
| <i>Comesperma volubile</i>                           |
| * <i>Polygala sp.</i>                                |
|                                                      |
| POLYGONACEAE                                         |
| <i>Persicaria lapathifolia</i>                       |
|                                                      |
| PRIMULACEAE                                          |
| <i>Myrsine variabilis</i>                            |
|                                                      |
| PROTEACEAE                                           |
| <i>Banksia aemula</i>                                |
| <i>Banksia oblongifolia</i>                          |
| <i>Banksia serrata</i>                               |
| <i>Banksia spinulosa</i>                             |
| <i>Consospermum ericifolium</i>                      |
| <i>Conospermum longifolium</i>                       |
| <i>Consospermum taxifolium</i>                       |
| <i>Grevillea juniperina</i> subsp. <i>juniperina</i> |
| <i>Grevillea mucronulata</i>                         |
| <i>Hakea laevipes</i>                                |
| <i>Hakea sericea</i>                                 |
| <i>Isopogon anemonifolius</i>                        |
| <i>Lomatia silaifolia</i>                            |
| <i>Persoonia laurina</i>                             |
| <i>Persoonia linearis</i>                            |
| <i>Persoonia nutans</i>                              |
| <i>Petrophile pulchella</i>                          |
| <i>Petrophile sessilis</i>                           |
|                                                      |
| RHAMNACEAE                                           |
| <i>Cryptandra amara</i>                              |
| <i>Cryptandra spinescens</i>                         |
|                                                      |
| RUBIACEAE                                            |



|                                                  |
|--------------------------------------------------|
| <i>Opercularia diphylla</i>                      |
| <i>Pomax umbellata</i>                           |
| <i>Richardia stellaris</i>                       |
|                                                  |
| RUTACEAE                                         |
| <i>Boronia polygalifolia</i>                     |
| <i>Correa reflexa</i>                            |
| <i>Philotheca salsolifolia</i>                   |
|                                                  |
| SANTALACEAE                                      |
| <i>Exocarpos cupressiformis</i>                  |
|                                                  |
| SAPINDACEAE                                      |
| <i>Dodonaea falcata</i>                          |
| <i>Dodonaea triquetra</i>                        |
|                                                  |
| SAXIFRAGACEAE                                    |
| <i>Bergenia x schmidtii</i>                      |
|                                                  |
| SOLANACEAE                                       |
| <i>Solanum americanum</i>                        |
| * <i>Solanum mauritianum</i>                     |
| * <i>Solanum nigrum</i>                          |
| <i>Solanum prinophyllum</i>                      |
| * <i>Solanum sisymbriifolium</i>                 |
|                                                  |
| SCROPHULARIACEAE                                 |
| <i>Eremophila debilis</i>                        |
|                                                  |
| STYLIDIACEAE                                     |
| <i>Stylidium graminifolium</i>                   |
|                                                  |
| THYMELAEACEAE                                    |
| <i>Pimelea linifolia</i> subsp. <i>linifolia</i> |
|                                                  |
| VERBENACEAE                                      |
| * <i>Lantana camara</i>                          |
|                                                  |
| VIOLACEAE                                        |
| <i>Viola hederacea</i>                           |
|                                                  |

|                                   |
|-----------------------------------|
| <b>MONOCOTYLEDONS</b>             |
|                                   |
| <b>ANTHERICACEAE</b>              |
| <i>Arthropodium milleflorum</i>   |
| <i>Caesia parviflora</i>          |
|                                   |
| <b>ARECACEAE</b>                  |
| * <i>Syagrus romanzoffiana</i>    |
|                                   |
| <b>ASPARAGACEAE</b>               |
| * <i>Asparagus aethiopicus</i>    |
| * <i>Asparagus asparagoides</i>   |
| <i>Laxmannia gracilis</i>         |
| <i>Lomandra confertifolia</i>     |
| <i>Lomandra cylindrica</i>        |
| <i>Lomandra filiformis</i>        |
| <i>Lomandra glauca</i>            |
| <i>Lomandra gracilis</i>          |
| <i>Lomandra longifolia</i>        |
| <i>Lomandra multiflora</i>        |
| <i>Thysanotus tuberosus</i>       |
|                                   |
| <b>ASPHODELACEAE</b>              |
| <i>Bulbine bulbosa</i>            |
| <i>Dianella longifolia</i>        |
| <i>Dianella revoluta</i>          |
| <i>Tricoryne elatior</i>          |
| <i>Tricoryne simplex</i>          |
| <i>Xanthorrhoea media</i>         |
| <i>Xanthorrhoea minor</i>         |
| <i>Xanthorrhoea resinosa</i>      |
| <i>Xanthorrhoea</i> sp.           |
|                                   |
| <b>COLCHICACEAE</b>               |
| <i>Burchardia umbellata</i>       |
|                                   |
| <b>COMMELINACEAE</b>              |
| <i>Commelina cyanea</i>           |
| <i>Murdannia graminea</i>         |
| * <i>Tradescantia fluminensis</i> |
|                                   |

|                                    |
|------------------------------------|
| CYPERACEAE                         |
| <i>Carex inversa</i>               |
| <i>Cyathochaeta diandra</i>        |
| <i>Cyperus brevifolius</i>         |
| <i>Cyperus congestus</i>           |
| * <i>Cyperus eragrostis</i>        |
| <i>Cyperus sesquiflorus</i>        |
| <i>Eleocharis cylindrostachys</i>  |
| <i>Fimbristylis dichotoma</i>      |
| <i>Gahnia aspera</i>               |
| <i>Gahnia</i> sp.                  |
| <i>Lepidosperma gunnii</i>         |
| <i>Lepidosperma laterale</i>       |
| <i>Ptilothrix deusta</i>           |
| <i>Schoenoplectiella mucronata</i> |
| <i>Schoenus apogon</i>             |
| <i>Schoenus brevifolius</i>        |
| <i>Schoenus ericetorum</i>         |
|                                    |
| HAEMODORACEAE                      |
| <i>Haemodorum corymbosum</i>       |
| <i>Haemodorum planifolium</i>      |
|                                    |
| HYPOXIDACEAE                       |
| <i>Hypoxis hygrometrica</i>        |
|                                    |
| IRIDACEAE                          |
| <i>Patersonia glabrata</i>         |
| <i>Patersonia sericea</i>          |
|                                    |
| JUNCACEAE                          |
| <i>Juncus remotiflorus</i>         |
| <i>Juncus subsecundus</i>          |
| <i>Juncus usitatus</i>             |
|                                    |
| ORCHIDACEAE                        |
| <i>Caleana major</i>               |
| <i>Calochilus</i> sp.              |
| <i>Diuris</i> sp.                  |
| <i>Genoplesium woollsii</i>        |
| <i>Genoplesium</i> sp.             |

|                                |
|--------------------------------|
| <i>Prasophyllum elatum</i>     |
| <i>Pterostylis acuminata</i>   |
| <i>Pterostylis</i> sp.         |
| <i>Thelymitra</i> sp.          |
|                                |
| POACEAE                        |
| <i>Aristida ramoae</i>         |
| <i>Aristida vagans</i>         |
| <i>Aristida warburgii</i>      |
| <i>Austrostipa pubescens</i>   |
| <i>Bothriochloa macra</i>      |
| * <i>Briza subaristata</i>     |
| * <i>Chloris gayana</i>        |
| <i>Cymbopogon refractus</i>    |
| <i>Digitaria parviflora</i>    |
| <i>Digitaria</i> sp.           |
| <i>Deyeuxia quadriseta</i>     |
| <i>Dichelachne crinita</i>     |
| <i>Dichelachne micrantha</i>   |
| <i>Echinopogon caespitosus</i> |
| <i>Echinopogon ovatus</i>      |
| * <i>Ehrharta erecta</i>       |
| <i>Entolasia marginata</i>     |
| <i>Entolasia stricta</i>       |
| <i>Eragrostis brownie</i>      |
| * <i>Eragrostis curvula</i>    |
| <i>Imperata cylindrica</i>     |
| <i>Microlaena stipoides</i>    |
| <i>Oplismenus aemulus</i>      |
| <i>Panicum simile</i>          |
| <i>Paspalidium aversum</i>     |
| <i>Paspalidium criniforme</i>  |
| <i>Paspalidium distans</i>     |
| <i>Rytidosperma pallidum</i>   |
| <i>Rytidosperma pilosum</i>    |
| <i>Rytidosperma racemosum</i>  |
| <i>Rytidosperma tenuius</i>    |
| <i>Rytidosperma</i> sp.        |
| * <i>Setaria parviflora</i>    |
| <i>Sporobolus creber</i>       |
| <i>Sporobolus elongatus</i>    |

---

|                           |
|---------------------------|
| <i>Themeda triandra</i>   |
|                           |
| RESTIONACEAE              |
| <i>Baloskion pallens</i>  |
| <i>Empodisma minus</i>    |
| <i>Lepyrodia scariosa</i> |
